# Supplementary material
Source: Springer Nature journal article supplement (https://www.springermedizin.de/resource/supplementary/12967_2012_1341_MOESM3_ESM.pdf/9573270)
Supplement: MOESM3 [file 9573270]

Table 2a. Genes impacted by ipilimumab in CD4<sup>+</sup> T cells

| Gene symbol                                                  | Gene name                                           | Fold-change | p-value  | FDR      | Pre-Mean ± SD    | Post-Mean ±SD    |
|--------------------------------------------------------------|-----------------------------------------------------|-------------|----------|----------|------------------|------------------|
| <b>Cell cycle-related</b>                                    |                                                     |             |          |          |                  |                  |
| CDC2                                                         | cell division cycle 2, G1 to S and G2 to M          | 1.98        | 0.009    | 0.0409   | 18.61±4.41       | 36.92±21.36      |
|                                                              |                                                     | 2.78,       | 0.0142,  | 0.0432,  | 66.68±59.31,     | 185.59±185.36,   |
| TYMS                                                         | thymidylate synthetase                              | 2.77        | 0.0075   | 0.0408   | 129.75±58.10     | 358.99±254.47    |
| CCNB2                                                        | cyclin B2                                           | 2.08        | 0.0142   | 0.0434   | 28.17±11.75      | 58.49±45.13      |
| CDK7                                                         | cyclin-dependent kinase 7                           | 1.26        | 0.0074   | 0.0408   | 214.08±75.01     | 270.13±106.34    |
| <b>Cytokines-related</b>                                     |                                                     |             |          |          |                  |                  |
| PGDS                                                         | prostaglandin D2 synthase, hematopoietic            | 2.2         | 0.0024   | 0.0393   | 14.20±5.42       | 31.30±14.57      |
|                                                              |                                                     | 1.51,       | 0.0048,  | 0.04044, | 489.68±470.87,   | 740.39±581.83,   |
| TGFBR3                                                       | transforming growth factor β RIII                   | 1.39        | 0.0111   | 0.0411   | 505.71±304.47    | 701.22±246.45    |
| IFNγ                                                         | interferon, γ                                       | 1.46        | 0.0255   | 0.0751   | 138.35±104.72    | 201.55±120.78    |
| IL-7                                                         | interleukin 7                                       | 1.28        | 0.0169   | 0.0511   | 15.43±10.42      | 19.73±8.89       |
| STAT1                                                        | signal transducer and activator of transcription 1  | 1.28        | 0.0081   | 0.0409   | 1141.96±330.11   | 1460.67±577.64   |
| SCYE1                                                        | small inducible cytokine subfamily E, member 1      | 1.27        | 0.0103   | 0.041    | 278.24±100.74    | 352.82±149.81    |
|                                                              |                                                     | 0.80,       | 0.0061,  | 0.0406,  | 5219.38±1457.55, | 4291.38±1772.32, |
| IL-7R                                                        | interleukin 7 receptor                              | 0.74        | 0.0011   | 0.0375   | 3309.89±1296.32  | 2467.81±1094.22  |
| IL-2Rα                                                       | interleukin 2 receptor, α                           | 0.69        | 0.0181   | 0.0544   | 113.56±58.89     | 79.12±39.28      |
| IL-15                                                        | interleukin 15                                      | 0.74        | 0.0032   | 0.0398   | 54.76±39.59      | 40.63±31.09      |
| TNFSF8                                                       | tumor necrosis factor superfamily, member 8         | 0.73        | 0.0202   | 0.0605   | 248.08±148.25    | 181.53±92.03     |
| <b>Chemokines-related</b>                                    |                                                     |             |          |          |                  |                  |
|                                                              |                                                     | 1.29,       | 0.0055,  | 0.0405,  | 1449.91±772.02,  | 1867.82±802.10,  |
| ITGB1                                                        | integrin, β1 (antigen CD29)                         | 1.20        | 0.0012   | 0.0375   | 396.68±336.59    | 476.25±376.51    |
| CXCR3                                                        | chemokine receptor 3                                | 1.29        | 0.0286   | 0.0825   | 47.04±23.35      | 60.53±33.18      |
| CXCR7                                                        | chemokine receptor 7                                | 0.75        | 0.0205   | 0.0614   | 83.62±25.83      | 63.45±25.78      |
| ITGA6                                                        | integrin, α6                                        | 0.72        | 0.0211   | 0.063    | 1166.8±1046.57   | 837.4±796.19     |
| <b>Activation, proliferation and differentiation-related</b> |                                                     |             |          |          |                  |                  |
|                                                              |                                                     | 1.98,       | 0.0165,  | 0.0498,  | 41.58±22.80,     | 82.16±62.67,     |
| MKI67                                                        | antigen identified by monoclonal antibody Ki-67     | 1.69        | 0.0104   | 0.0410   | 19.37±9.50       | 32.73±20.37      |
| ICOS                                                         | inducible T-cell costimulator                       | 1.49        | 0.0011   | 0.0375   | 587.76±294.69    | 874.26±397.84    |
| GATA3                                                        | GATA binding protein 3                              | 1.43        | 0.0124   | 0.042    | 284.77±189.82    | 406.03±268.34    |
|                                                              |                                                     | 1.37,       | 0.0023,  | 0.0392,  | 163.55±83.74,    | 224.53±114.73,   |
| CTLA-4                                                       | cytotoxic T-lymphocyte-associated protein 4         | 1.37        | 0.0249   | 0.0734   | 511.58±260.28    | 700.23±359.54    |
| MICA                                                         | MHC class I polypeptide-related sequence A          | 0.7         | 0.0015   | 0.0379   | 120.33±67.61     | 84.36±51.72      |
| <b>BCL family-related</b>                                    |                                                     |             |          |          |                  |                  |
| Bcl3                                                         | B-cell CLL/lymphoma 3                               | 1.56        | 0.0036   | 0.0400   | 199.55±112.65    | 311.36±120.66    |
| BAK1                                                         | Bcl2-antagonist/killer 1                            | 1.26        | 2.00E-04 | 0.0365   | 130.50±27.61     | 164.92±33.45     |
|                                                              |                                                     | 1.24,       | 0.0067,  | 0.0407,  | 314.36±77.54,    | 388.54±79.60,    |
| Bcl2L11                                                      | Bcl2-like 11                                        | 1.21        | 0.0369   | 0.1053   | 442.48±299.18    | 536.88±388.57    |
| BCLAF1                                                       | Bcl2-associated transcription factor 1              | 1.21        | 0.0234   | 0.0695   | 61.14±14.91      | 73.89±26.64      |
|                                                              |                                                     | 0.72,       | 0.0158,  | 0.0479,  | 189.15±81.00,    | 137.91±40.11,    |
| Bcl2                                                         | B-cell CLL/lymphoma 2                               | 0.63        | 0.0050   | 0.0404   | 427.68±327.43    | 272.97±207.62    |
| <b>Apoptosis MAP kinase and protein kinase-related</b>       |                                                     |             |          |          |                  |                  |
| ANXA5                                                        | annexin 5                                           | 1.32        | 0.0271   | 0.0794   | 599.68±269.08    | 793.89±425.06    |
| MAPK6                                                        | mitogen-activated protein kinase 6                  | 1.31        | 0.0261   | 0.0768   | 209.49±142.30    | 273.63±202.36    |
| PPP1CC                                                       | protein phosphatase 1, catalytic subunit, γ isoform | 1.23        | 0.0152   | 0.0462   | 998.56±432.59    | 1225.87±571.01   |
| CASP7                                                        | caspace 7, apoptosis-related cysteine peptidase     | 1.22        | 0.0145   | 0.0441   | 141.11±41.72     | 171.83±48.77     |
| MAP2K6                                                       | mitogen-activated protein kinase kinase kinase 6    | 0.77        | 0.0105   | 0.0410   | 77.3±41.24       | 59.77±33.17      |
| ANXA11                                                       | annexin 11                                          | 0.75        | 0.0003   | 0.0368   | 93.23±20.45      | 70.21±31.98      |
| ATF7                                                         | activating transcription factor 7                   | 0.75        | 0.0252   | 0.0743   | 170.44±120.64    | 128.30±107.21    |
| MAP4K4                                                       | mitogen-activated protein kinase kinase kinase 4    | 0.63        | 0.0095   | 0.041    | 137.49±51.60     | 86.97±29.96      |

Table 2b. Genes impacted by ipilimumab in CD8<sup>+</sup> T cells

| Gene symbol                                               | Gene name                                         | Fold-change | p-value  | FDR     | Pre-Mean ± SD  | Post-Mean ±SD  |
|-----------------------------------------------------------|---------------------------------------------------|-------------|----------|---------|----------------|----------------|
| <b>Cell cycle-related</b>                                 |                                                   |             |          |         |                |                |
| CDC2                                                      | cell division cycle 2, G1 to S and G2 to M        | 1.81        | 0.03     | 0.0897  | 18.37±6.09     | 33.23±21.15    |
| CDCA7                                                     | Cell division cycle associated 7                  | 1.67        | 0.0113   | 0.0647  | 87.63±93.37    | 146.50±111.23  |
| <b>Cytokines-related</b>                                  |                                                   |             |          |         |                |                |
| TNFSF4                                                    | tumor necrosis factor superfamily, member 4       | 0.58        | 0.0082   | 0.0647  | 40.88±27.10    | 23.93±14.71    |
| <b>Chemokines-related</b>                                 |                                                   |             |          |         |                |                |
| ITGAV                                                     | integrin, αV (antigen CD51)                       | 0.80        | 5.00E-04 | 0.0647  | 114.65±54.10   | 91.78±42.91    |
| <b>Activation Differentiation and Interaction-related</b> |                                                   |             |          |         |                |                |
| HLA-DRB4                                                  | major histocompatibility complex, class II, DR β4 | 1.4         | 0.0163   | 0.0647  | 28.04±26.29    | 39.18±37.40    |
|                                                           |                                                   | 1.39,       | 0.0100,  | 0.0647, | 178.84±104.07, | 248.93±148.36, |
| GATA3                                                     | GATA binding protein 3                            | 1.35        | 0.0026   | 0.0647  | 139.84±44.14   | 188.83±75.51   |
| HLA-DRA                                                   | major histocompatibility complex, class II, DR α  | 1.38        | 0.0193   | 0.0647  | 540.53±402.57  | 745.47±350.32  |
| CD6                                                       | CD6 molecule (CD166 receptor)                     | 1.32        | 0.0248   | 0.0754  | 179.47±95.79   | 236.58±157.76  |
| CD5                                                       | CD5 molecule                                      | 1.22        | 0.0181   | 0.0647  | 103.58±38.21   | 126.47±45.17   |
| EOMES                                                     | Eomesodermin                                      | 0.69        | 0.0292   | 0.0877  | 1063.26±642.42 | 738.05±445.38  |
| <b>Apoptosis,MAP Kinases-related</b>                      |                                                   |             |          |         |                |                |
| TIAM1                                                     | T-cell lymphoma invasion and metastasis 1         | 1.68        | 0.0105   | 0.0647  | 83.63±67.00    | 140.61±116.68  |
| ANXA5                                                     | annexin 5                                         | 1.31        | 0.0114   | 0.0647  | 576.93±278.33  | 747.53±316.78  |
| API5                                                      | apoptosis inhibitor 5                             | 1.24        | 0.0088   | 0.0647  | 187.92±118.48  | 233.04±151.93  |
